# Supplementary material for: Irish Traveller Children’s Play: A Scoping Review
Source: Springer Nature journal article supplement (doi:10.1007/s10826-023-02695-w), 2023-10-12
Supplement: MOESM2 [file 26173284]

| ***Irish Traveller children’s play: A scoping review.***  Full Text Review Data Extraction Chart | | |
| --- | --- | --- |
| Author | Main Findings | Supporting References. |
| Boyle, A; Hanafin, J; Flynn, M | Parental Optimism towards education despite own experiences of racism and ongoing experiences of children. | Irish Travellers experienced racial bullying in their own schooling and they witnessed their children experiencing racial bullying and stereotyping in primary and secondary schooling.  Their relationships with settled children were often marked by name-calling and negative stereotyping.  *If they’re facing it in school, if they are called knackers, the first word that’s said is the same word that was said when we were in school....‘Names won’t hurt you’–that’s taught to the children inside in school. Well, know that it is hurting you if you’re called knacker. My little one...she’s twelve, she was telling me there this morning that some of the rest of the children in her school was calling her a knacker, do you know what I mean. And I told he, like, to go up to the teacher and explain to the teacher, for to tell the teacher, like, what they were calling her. She doesn’t like it; do you know what I mean.*  In relation to developing recognition of traveller cultural heritage in the curriculum, Travellers spoke about the tension for them between adapting and belonging and asserting traveller identification.  Parent expressed importance of mixing with settled.  *I went to school until I was twelve or thirteen. I left because I couldn’t be bothered with it and I was the only Traveller child sitting at school and I was isolated and I had no friends in it*.  School had felt like an alien place and he left in order to escape from the isolation and the sense of not belonging. Traveller children entered schools where the teachers, pupils and the school environment represented the settled population, and where there was no recognition of Traveller culture, and they felt unchallenged, friendless, marginalised, and unwanted. |
| Greenfields, M; Smith,D.M | Cultural identities are sustained in housing using strategies including the presence and social interaction with kin and other Gypsy/Travellers which helps to mitigate some of the difficulties experienced providing a crucial source of support however these social relations may also be restricted to close bonding networks and intensify social isolation of  Gypsy/Traveller communities and further fragmenting neighbourhoods along ethnic lines. | *I don’t like me kids to mix with gorgers, I like them to play and mix with other Travellers’*.  *They [non-Gypsies] cannot take criticism about their own families and if you complain it’ll end up in a fight whereas Travellers they will take advice and sort their kids out when they play up ‘cos we all know each other so ‘I’ll tell your father’ normally does it.* |
| Smith, D.; Ruston, A. | The influence networks play in shaping health behaviour is dependent on the particular social context of the group and its status in relation to wider social structures, making generalization problematic.  Importance of intergenerational mixing, impact of housing on ability to supervise children playing & youth moving towards drugs due to lack of protection of community. | *It’s important to have family close and mix with all ages ... you need communication between the generations it’s having youngsters round here that keeps me healthy ... In our culture the young and old have always mixed.*  Previously these operated through networks of proximate social ties and communal surveillance of, and responsibility for, children. For example, the following respondent described the loss of their ability to ‘see’ and supervise the children once they were moved into housing*: On a site we can all see the children and who they’re playing with. In a house once the door’s shut you can’t see who they’re going with. (Interview 23)*  *We have barriers and we have got, like, a circle and we don’t let our children wander out of that; but the children lose their way [in housing] when they become teenagers. They’re completely lost. They get into drugs and everything. (Interview 26)* |
| Boyle, A; Hanafin, J; Flynn, M. | Traveller parents' involvement in Early Years settings ( segregated) increased when they felt their culture was recognised and appreciated and they felt welcomed and protected. Significantly, Traveller parents were able to provide considerable curricular and extra-curricular support for their children both in the school and home settings.  Parents praising children's actvities & produce, children engaging with play based learning, respect for belongings produced-put in folder, songs & rhymes and role play evident. Importance of the social aspect of learning | Many examples of cultural inclusion in the preschools were mentioned by both parents and teachers. Individual preschools had procured books, jigsaw puzzles, posters and toys depicting aspects of songs. Parents praised the pictures and crafts that their children brought home and their efforts with songs and rhymes, understanding the need to be positive and supportive of their children’s learning. Respect for belongings-art made “*He’ll have a big folder and their colouring and all the things they’ve”*  *We had taken some video footage of the kids playing, engaged in different activities ... and then we brought [parents] in for an evening, just a social evening and we showed them some of this as well.*  *They are learning a lot here and I think it is a good experience for them because they’re doing their painting, they are coming back telling their stories, they’re singing songs. They know how to mix in with the other children and being polite... so I think the preschool is very good education for the kids.* told how her daughter role-played the preschool activities when she came home: “My [daughter] sits by herself and talks to herself. ‘*I’m the teacher, you’re the child ’with a book and copy. She’d be doing this [I’m a little] teapot thing”*  *When I’m raising the kids, a lot goes into being mannerly to people, "do not curse,"you know, because people on the outside expect Travellers to be violent, have bad language. They are scared of them. So that’s why I bring my kids up to be very good and very well-behaved*.  Maisie (parent, Castletown) stated that the preschool provided an opportunity for children to mix with others. She said that *“getting used to people* ”was a useful skill. Hannah (parent, Seanbaile) expressed this view also, and Tom (parent, Seanbaile) added, *“and make friends*.” Grace (parent, Seanbaile) supported this and said, *“They know how to work in a group and with one another*.” Shane (parent, Avonard) said: “*They learn how to share and be civil to each other*  *If a child is having difficulties with colours etc. I will explain to the parent and give them ideas how to teach the child to play.* Lucy (parent, Lisnashee) was asked by her son’s teacher, Tríona, to work at home with him. This had given Lucy an understanding of the benefit of the preschool activities for his development. She explained: *“What I’ve tried to start now was to do more with his hands and his actions ... Tell him a story, play with him and show him how to do things.”Lucy took this task seriously, trusting that the teacher’s advice*” |
| Brown, C. | Traveller Child is isolated within schoolyard & at breaktime-with no friends-walking around and waiting, in hallways. Excluded – teachers complicit-intersects with ability level also. Occasional social interaction on periphery of girls chat during breaktime.  Neo-liberal imperatives of accountability and performance can be seen to shape hierarchies of belonging, where pupils’ positioning in ‘ability’ groupings enables/limits the spatial agency that they can exert. | S  Megan’s experience out-of-class merely compounded her isolation within*: ‘I hate break because it’s just you feel left out, everyone’s got a friend and you’re just walking round and everyone thinks you’re a loner’(Megan).*  Indeed, I spent several days surveying the lunch hall and playgrounds for Megan during breaktimes without a sign of her.  Megan*: If the tutor [room] is closed I just walk around waiting for lessons to be back on. CB: Walk around school? Megan: Walk around inside, if I have maths I’ll walk around the maths corrido*r. Here it can be seen that Megan lacked a sense of belonging in any part of the school, and accordingly was forced to wander aimlessly.  *Where is your favourite place in school? Megan. Nowhere, probably just tutor room when the door's open. CB. do you prefer it during breaktimes or tutor group times?. Megan. No I like it during break times. Yeah because all the girls in the class just talk to each other in the tutor ( group time). Sometimes ( during breaktimes) I talk with the girls, they all sit in their own little circle and chat. CB Must be confusing? Megan : Yeah.* - Researcher observed Megan still on periphery of group. |
| Brown,C. | Friendship as social capital | Megan had no friendships in secondary school |
| Brunnberg, Elinor; Visser-Schuurman, Mieke | Children, particularly children in vulnerable situations or with special needs, are insufficiently aware of their rights and face discrimination. Need to be seen as social actors.  Control group choose right to play, right to express opinion, right not to be abused. Traveller children choose right to education, health and right of minority groups to own culture. | Only Irish Traveller children identified the right to enjoy your own culture (Art30 ?., UNCRC) as one of the four priority rights. The children said that they were proud of who they were and where they came from. The right to play was only chosen by the Greek children, which might be explained that the other groups felt that other rights were more important to them if they could only choose four  In Ireland, the group of Traveller children solely consisted of girls, since in Traveller culture there is limited contact between young boys and girls. Parents are often not comfortable giving permission to young girls to attend external events with boys. |
| Cavaliero, T. | Based on the findings of this research I will suggest that cultural dissonance, discrimination, differing perceptions of the purpose and value of education and the lack of a culturally relevant curriculum are significant factors which affect the ways in which Traveller pupils’ construct their identities as ‘outsiders’ in school.  Memories of segregation & racism on playground, racism on current playgrounds, " messing" when together in classroom-? LAck of attendance. Parental preference for keeping younger children at home. | *Older participants spoke of* the range of obstacles they faced most often in the form of discrimination and unfair treatment including separate playgrounds round the back of the school. A further frequent *complaint voiced by older participants* was the humiliation they suffered at having to pick up the litter in the settled children’s playground.  The majority of participants felt that preschool was too early to send a child away and the practice of keeping the youngest child at home for company would testify to this.  They found that the term ‘knacker’ was widespread. Brooker and Broadbent’s(2007) study drew attention to the issue of children’s discourse becoming significantly more racialized, and sexualized between the ages of 5-7 often taking the form of name-calling, particularly during break times. This finding is supported by my own experience and research (R.E.C.A.L.L : 2010) when Martin McDonagh claims, “*we were called Tinkers, Minkers, Knackers, Bowsys...by the young people growing up”*  *Saying why even bother?, why even bother being his friend? You’re never gonna be...you’re never gonna become friends...d’you know what I mean? they look at you like second class citizens and then you know Travellers look back at them and go ‘Why, why even bother like? You’re never going to become friends...and we’re...we’re still the lower class people, d’you know what I mean*?  Some parents who were interviewed felt that the presence of other Travellers prevented their children from receiving a fair education opportunity as they were all treated as ‘messers’ and that sitting Travellers together was a bad idea as it encouraged messing.  Cultural  Conversations with young people from the Travelling community revealed that they were frequently sent home from school for ‘*messing*’. Kenny (1997) has suggested that ‘messing’ is an essential Traveller male construct which is only problematic in certain contexts that is, school, “I would add that fighting, a valued sport among Travellers, is an important part of males’ messing....What is new to Travellers in relation to this tolerated ‘messing’ is the clash between the sanction accorded this behaviour within the group, and the prohibition on it within a school.......Messing becomes problematic when introduced into school: it impedes achievement of the desired outcomes of learning, and acceptance as equal to sedentary children..” (Kenny: Reference ) |
| Cavaliero,T;Levinson,M | Friendships with other minoritised communities leads to shifting identities within Irish Traveller community. Acting & role playing being Polish demonstrated the fluidity of identities. Siblings influenced younger children's games. | Certainly the older generation involved in this research seemed to mix less than the younger generation  During fieldwork, on several occasions in the gym, young women from the Polish community were observed, mistakenly, identifying some of the research participants as Polish, and had struck up conversations with them in Polish. Though rectified by the research participants, this later led to the beginnings of tentative friendships.  Subsequently, young Traveller women were observed during fieldwork engaging in a game developed with their younger siblings called“Being Polish”: *One of the girls in the center starts talking to Kathleen because she thought she was Polish. And she does look Polish and it would be easy to mistake her for Polish. So we play a game with my little cousins:“Are you Polish?”(Keela, 25)*  Being Polish or“Polishing”- Traveller identity was seen as lower class cultural specific familial practices such as sibling child care influence younger siblings through the creation of new games, which play with new identities. |
| Cemlyn,S. | There is a need for early years provision, reduced play spaces (due to urban accommodation & impact of legislation), perception of children running wild. | *Most social workers have this image where Gypsies are dirty and let their children run wild...There’s probably good social workers out there prepared to help but just haven’t had the learning with Travelling people*.’(Irish Traveller)  Services including playgroups examples in areas and reference to need to develop  Social workers identified -Early years provision was evident in some form in each of the areas. However, there was a general view among interviewees that it was a priority area for development. Urban Traveller sites are cramped and restrictive of children’s play, lacking either on-site facilities or the kind of creative opportunities previously available on more open, self-chosen sites.  In rural areas, the CJPOA has exacerbated an unsettled and isolated lifestyle for some families, with consequent reduction of play opportunities |
| Cudworth, D. | Mixing of findings GRT. | Reduced Attendance at school: Not present -"*Thus, they often fail to build an attachment to the school so it remains"*  Freedom at Home: *We’re always in each other’s places; either I’ve got 15 children screaming or she’s got them all in one running over the place – it’s dead nice. I think all travellers are like that though, on any site. They all look out for each other’s kids. (Parent)*  *Our kids are never in, they are never ever in...99 per cent of the travelling children are always outside busying themselves...They spend most of the time outside doing something...they would rather be outside.* (Parent)  It is the responsibility of these older siblings to look after and keep an eye on the younger members of their family. Break times he’d [older brother] come and find me.  *Every morning you’d see the three of them walking to school, when they did not live very far,and obviously that breaks all the rules...four year olds without an adult...But clearly culturally it is seen as acceptable to them. So that’s caused a bit of a hazard* |
| Devine, D; McGillicuddy, D. | Unsafe spaces to play- impact of government policies & practices, playfulness within loving family interactions, interactions with settled GAA, fighting back, gender influences, relationship with horses, need for privacy between adults and children | They took photos of nettles and broken glass beside their play space. What I don’t like here is too much glass and if a child walks up there and they slip on the ground they get cut to bits. (Maria)  Spatial  For Julie the barbed wire signalled ‘danger’ and threat to personal injury during children’s play: They keep shoutin at us...I think it’s very dangerous just in case like a child could cut herself to pieces.  The cameras acted as a means of control by the police who in Julie’s words were ‘in and out every second’ and experienced by the children as imposing on their freedom to play. because the guards (police) like would come in and out and you know like it would be very dangerous for them. (Julie  The local sports (GAA) club was particularly important to Tom who spoke warmly about the photographs he took of the club, and the associated benefits of being part of a team. Significantly his Traveller identity was at first hidden but is now something he is comfortable to share  This included ‘making a funny face’(Julie) and playing with a blanket:put it over her head and then I told her to take off the blanket off her head...and then she said one sec and then she took it off so I took the picture. (Hugh)that’s my baby sister, she’s my princess. (Julie)  Male practices of care also emerged in boys’ narratives about caring for horses, central to Traveller culture and identity (Convery and O’Brien,2012). Caring for horses included cleaning out their living area, feeding them and taking them for a ride either on their back or on a‘sulky’  she is proud of the ‘gym’ that has been purposely built by her uncle for children’s use but it is also clear there is a need (for both adults and children) to have ‘time apart’from each other . My uncle put them in here...because he said, when they’re talking private we can just go into the gym. (Nan) |
| Devine,D;Kenny,M,Eileen Macneela,E. | The significance of ethnic identity to children’s negotiations around inclusion and exclusion in their peer groups.  Significance of ethnicity to social inclusion & exclusion. Travellers are the most impacted group, name calling in playground and on the way to school, on football pitch, need to challenge majority children, benign view of adults towards racism | If we take the dimension of inclusion/exclusion firstly, interview data confirmed the importance of the children’s social relationships to their sense of ‘belonging’ in school. Such belonging overlapped with home lives in the invitations to birthday parties, sleepovers and general playing/interacting together after school hours.  Ethnic difference cut across the children’s experience of both inclusion and exclusion among their peers, and was used by children to gain the upper hand with one another in their game  There was evidence, for example, of racist name-calling among boys in the playing of football games and matches in both schools.  Most of the name-calling that the children recounted took place in the backstage (Goffman1971) regions  of  school  life,  especially  in  the  yard  during  playtime.  As  documented  else-where (e.g. Devine 2002), here backstage behaviour abounds, as teachers find it impossible to  keep  an  eye  on  all  that  the  children  ‘get  up  to’. |
| Doyle, D.M; Muldoon, M; Murphy, C. | The article concludes that a variety of exclusionary practices have facilitated the establishment of a defacto two-tiered education system in Ireland, with marginalised groups such as asylum-seekers;religious minorities; and the indigenous Traveller community particularly disadvantaged. | The negative experiences of older Travellers in schools has perhaps contributed to a reluctance among children in this community to engage with the education system. As one interviewee put it: *A lot of older Travellers are afraid to approach the schools, because they had such a bad time in school, being discriminated against in school . . . there were segregated yards.*    Memories of segregation in school. Despite legislation acknowledging parents as primary educators- The State shall, however, as guardian of the common good, require in view of actual conditions that the children receive a certain minimum education, moral, intellectual and social |
| Fitzpatrick, P; Molloy, B; Johnson, Z. | Positive outcomes from programme  Post Tx, more cognitive games & nursery rhymes with children, 95% of mothers looked favourably on programme. | Mothers played more games and nursery rhymes with children.  Halting site inspections to ensure safety standards- in relation to accidents- Falls reported  Findings challenge deficit discourse. Travellers would not prioritise health prevention \promotion however findings indicate favourable engagement |
| Forkan, C. | Range of factors contribute to educational disadvantage: Cultural & Educational. Absenteeism from school is an issue due to similar factors- cultural and educational. | As regards the former, the Officers were agreed that Traveller integration was very good as ‘*Travellers like to see themselves as fitting in with everyone in the class’*. Despite this, in out-of-class time, integration was relatively poor, with Travellers usually gathering together to play and chat.  The lack of out-of-class integration is not helped by the fact that few Traveller children engage in extra-curricular activities run by the school  When asked if they liked going to school, the overwhelming response was positive. They liked the teachers. They liked P.E., Art, English and the bigyard to play in.  Absenteeism from school-The data suggest that aspects of Traveller culture both support and hinder the participation and progression of Traveller children within the education system- second factor having an impact on young Travellers’ experiences of education is that of the educational institutions themselves-positive supports, some negative including being held back . |
| Gray, C.; Donnelly, J | Findings suggest that, irrespective of ethnicity, parental concerns are frequently dismissed by health professionals, school choices are made by educators and family lifestyle is profoundly affected when parenting a child with ASD  Needing to settle-missing culture & social, bullying. | *None of mine ever went to nursery but the support worker thought it would help him and it has. He likes it. We didn’t pick it but I’m happy enough*. (TF1)  *Once Barney started at the playgroup we decided not to move him. Me and the girls live here, the men travel for work. It’s really hard, desperate really, but our Barney needs routine.* Description of missing travel as social workers & services blaming parents & life in trailer on child's tantrums.  Active and curious, Sean avoided all eye contact. He reacted well to the puppets used to engage him in discussion, touching their faces, hands and feet. Although he did not respond to the questions posed by the researcher, he was responsive to his mother’s prompts. For example, when Rose repeated our preliminary question regarding his favourite toy he picked up a nursery book and toy car. Similarly, when asked who he liked to play with, he hugged his mummy and shouted  Using a hand puppet, Barney was asked what he most likes to play with. Looking at the puppet, Barney said:I like the club, but only when the Travellers go. It should be for Travellers only. I don’t like when corner boys [boys living in the local neighbourhood] go. According to Barney, the corner boys:...calls us Gypsy and Gypo. It’s not nice. We get blamed for calling them names and they call us names all the time. They laugh at me too. I don’t like them. They want to fight us. Barney did not initially appear to understand when his mum asked him to tell us about being bullied at school. Then, he suddenly put his hands over his ears and said ,‘No, no, no, my teacher’s nice’. His mother explained that local children like to fight Traveller children.  Remaining on site means that Traveller families are unable to fulfil important cultural practices. According to Rose (TF1*),‘Everyone thinks it’s the weddings, but funerals are important to Travellers. Showing your respect is important. When you don’t go, the children don’t get to know their cousins and family and you feel you’re failing them’*. For Rhonda (NT2),restricted travel is a‘*seismic shift in lifestyle’*. Having travelled extensively for pleasure and work, she misses the opportunity to develop a ‘*wider cultural knowledge’* |
| Hamilton, J; Bloomer, F; Potter, M | The article focuses on the views of the statutory and voluntary sector to assess the adequacy and effectiveness of educational provision for Traveller children and young people and reviews the policies in place relating to the provision of education for Travellers in Northern Ireland. It also considers the issue of segregated education for the Traveller com-munity and how for some this segregation can exacerbate social exclusion, disadvantage and discrimination | The needs of the children were discussed and it was felt that for many there was a desire to mix with settled children and become integrated. In terms of integration many Board representatives stated that young Travellers were not inclined to become involved in after school activities such as sports. For many this was due to transport issues rather than a reluctance to ‘mix’withtheir settled peers as can be perceived by the settled population  However, there was an overriding confidence among parents that their children *could ‘give as good as they get’* and indeed it was also felt that older Traveller children were always there to‘look out for the younger ones  ‘I used to sit alongside him (her brother) at break times as I couldn’t blend in because they used to call me names all the time. There was one girl who was nice, but that was it, but only if she didn’t have her other friends if she had nobody else’(BELBarea)  Fieldworkers noted that there was little interest in games that demanded long periods of concentration, such as chess or scrabble. This was attributed to factors such as “*a natural restlessness.”* They also noted that Gypsy children, especially boys, reacted in a particularly bad way to losing, and it was suggested by several fieldworkers and teachers that problems developed when they tried to enforce sharing and turn taking. In particular, this seemed to involve boys: *Games are the worst. It’s easy to lose control. Some of the Traveler boys can just be completely wild. Maybe it’s this tough, macho thing from their homes, I don’t know. But they seem to be trying to dominate everyone else through violence. (Richard, primary teacher*)  *There was this teacher at the primary school, never had any dealings with the Traveler children. Kept trying to get them to wait and take turns. ‘Course, it was just making things worse: most of them paid not the least bit of attention. (Dylan, social worker*) Such comments reflect established practices surrounding play in the school environment, implying some sort of juxtaposition between home and school cultures. In the rejection of expectations regarding the social niceties of play, Gypsy children would appear to be challenging established notions and discourses.  It would appear that the notion of play here is quite different than that of the surrounding society. While fighting might well be commonly viewed as a natural, even desirable, feature of male development, a violent outburst such as that witnessed above would more likely be interpreted as a breakdown of the normal play patterns and would seem to go beyond the rough-and-tumble considered the norm among boys (Pellegrini 1991). The inequality of the contest would have more probably engendered some form of intervention, and the older boy would be more likely to have incurred disapproval. However, in the context of Gypsy experience, where both intergroup and intragroup fighting are commonplace, there is the impression here of *play as a preparation for life*. There is also the potential for a more immediate gain in the form of enhanced status: even in a one-sided encounter, the mere act of engagement is likely to be viewed with more favor than the avoidance of a fight. As one mother observed after her son had been beaten up by an older boy, “*at least our Sean didn’t just stand there and take it: ‘e ‘ad a go*.” Once again, such features were corroborated by other observers: Children are left to sort out differences by themselves, and this can involve ferocious fighting.  *I remember Tanya coming to school with bruises—her mum was quite open that she was too weak and her older brother had caused them in play fighting to toughen her up. (Miranda, fieldworker*) Quite violent play fighting, involving both boys and girls, seemed to be approved of by participants in this study across the age range. For Jasmine (aged nine), fighting in a home setting appeared to relate to hierarchies. She said that she had a fight with a cousin, Crystal (aged eight), “to keep her in her place,” while she had repeatedly kicked another cousin (Barney, aged nine) to demonstrate publicly that she “could get the better of a boy” and to “remind him that his family was useless” and “not as important” as hers. Jasmine and a group of her friends agreed that it was important for girls to learn to look after themselves. Indeed, an impression given by a number of adults, too, was that without such preparation in an intragroup play environment at home, their children would be less equipped to survive in a hostile, intergroup context. Numerous children in this study spoke of getting involved in fights at school to defend other Gypsy children. Ben and Rob (aged eleven) agreed that non-Gypsies were inferior because they did not know how to fight and failed to support one another.  Socializing with adults often entails the sharing of tasks, and inevitably, this has an impact on time and opportunities for play: Girls do everything. What do boys do? Well,Traveling boys, like, go out ‘awkin’ after school and everything. Girls should basically be at home, housewifing. Cooking, cleaning, washing—all that can’t be done in an hour. She has to do the hoovering, wipe around, clean the bath, clean the floor, make the beds, wash the kitchen . . . feed the dogs, shop. It’s a fulltime job! And she has to go out hawking. There’s no time for nothing. (Val, aged eleven).  Katy (aged eight) said that she had almost no time to go out with her friends to play. At the same time, she showed a great deal of pride in her adult responsibilities. Crystal (aged eleven) suggested that she could play while she was feeding animals and looking after her younger brothers. On one occasion, Crystal expressed some contempt for a group of children (aged around eleven to fifteen) who were running around wildly outside her trailer, chasing one another  Children spoke of intergenerational activities; during recreation, as well as work, time was not spent necessarily within their peer group. Stan (aged seven), whose family lived permanently on one site and who was one of a number of children described by a fieldworker as having “*lost their traditions and [having] become like any other estate children*,” nevertheless said that he liked best “going lamping [catching rabbits] and picking mushrooms with granddad and Uncle Jim.” Similarly, Becky (aged nine) said that her mother was her best friend and confidante, while Chantelle (aged thirteen) observed that non-Gypsy girls would think she was “sad” if they discovered that the person whose company she most enjoyed was her grandmother. In the context of such shared time with older family members, intergenerational relationships are liable to determine the nature of play.  At the same time, the outcome can be patterns of interaction that are rather disconcerting to outsiders*: Some of the children don’t know how to interact with adults in a way we would call appropriate. Take Buz—totally uncontrolled. Only four-anda-half; just joined us. I knew there’d be problems and sent him to meet the ed. psych. [educational psychologist]. He walked in there. “Right,” he said. “Right,” the ed. Psych. said back, totally surprised. This was Grandad greeting the other men. That’s all that Buz was doing. (Theresa, head-teacher of primary school)*  It should be noted that observation during this study suggested that Gypsy children spend little time on their own. It has been suggested that being alone is, in itself, mistrusted in Gypsy communities (Carter 1996). This, in itself, is an important factor in shaping patterns of play  *Toy Bus-* Children moving constantly, tripping each other, shouting, taking things down, not following adult instruction, being rude to adults ( although responded to parents).Took screws for the bus. Clearly, I have been witnessing “play,” but what sort of play? The children have not appeared to accept any “rules.” In many ways, they have behaved as if they were outdoors. They have been unruly, practically uncontrollable, though most appear to know the boundaries that would mean exclusion, keeping just on the right side for a brief time after each final warning. Badge making and face painting are the activities several of the children tell me they enjoy the most. *Aaron tells m*e that they immediately perceived the opportunity to make money out of the first of those activities.  Yet the riotous, expressive play did not necessarily signify a lack of cooperation, for the children were interacting with one another throughout the session. A further possibility is that the children have also been mapping out the boundaries between the Gypsy and the non-Gypsy worlds; they have been discovering precisely how far they can go. A bonus element of fun might well be getting one over on the “Gadje.” Thus, the process might confirm antagonistic relations with non-Gypsies while also entailing status enhancement within their own group. |
| Hanafin, J; Boyle, A; Boyle, L; Flynn, M | Segregated preschools formed protective enclaves for Traveller children- A welcoming environment, respectful of culture, distributed leadership--all supported inclusion |  |
| Hurcombe, R; Bayley, M; Thickett, A; Thom, B. | This study highlights potential pathways for young male Travellers to become ‘‘youth at risk’’ importantly through involvement in alcohol and drug use. | Monitoring young people’s behaviour was considered to be a community effort, but was framed in terms of mutual support rather than being restrictive. This gave Travellers a sense of security for themselves and for their children: *Because when you’re in a Traveller’s site, you know everybody else. So you can let your children run. As long as they don’t go outside the gate, they can run around all day and you know they’re safe. And if they come back from school before you’re back you know they’re safe*  *Cause they’re with all their own, you know what I mean. Where if they’re in a council estate you’re always watching them because you don’t know who’s living there, you don’t know everybody in there [03]. We look after each other kids you know, if like say I weren’t on the site and some of the kids were on the road, I would get them and bring them into their mums and say ‘‘He’s been down the road you know’’, we help each other* [05].  Studies have shown that young male Travellers become ‘‘youth at risk’’ as they rarely attend secondary school and spend much time on the streets where some come into contact with drugs, gangs, petty theft, car crime, and attract the attention of the police as ‘‘street people’’. This often results in imprisonment in Young Offender Institutions sometimes progressing to adult prison (Power, 2004 in Cemlyn et al., 2009)  *Travellers started to settle down, they never like all travel together now, they all, like everybody’s doing their own thing, they’re all hidden away like, no one doesn’t really mix anymore*  Due to tight restrictions and discipline within families, young men (and sometimes women) break away from Traveller constraints and conventions in urban situations (Cemlyn et al., 2009). As our findings show, Travellers attempt to ‘‘protect’’ their young people from outside influences, such as withdrawing them from school at a young age, believing that they can prevent their mixing with the wider community. This increases the risks of young people becoming involved in alcohol and drug use, behaviours their community wish to protect them against |
| Joyce, S. | Racial boundaries exist that are socially constructed and are policed and governed in order to control and tighten their spatial mobility.The study highlights the veracity that young Travellers are severely restricted in their movements  Boredom, Girls more to do so impacts boys more, impact of racism on ability to use space and access opportunities. | Sure you have to get bored being stuck in all the time, then when you do go out it actually feels worse because you have people judging you all the time”. “Of course you get bored and then you have plenty of time on your hands to be thinking too deeply about things”  “It’s worst for the boys I think, because we can fill our time chatting, cleaning or minding the children, the boys just sit around bored and in a bad mood (rolls her eyes) - you can’t blame them really!”  The young Travellers discussed issues with a sense of violation through excessive regulation, surveillance (by the city council) and restrictions on their spatial mobility. “We can’t even climb the walls in our site coz if you do a voice comes out of the speaker telling us to ‘GET DOWN NOW’ they are watching us the whole time” “They watch us like a hawk everywhere we go” “Yeah it’s like an open jail or something” “There is nothing out here, look this is where they threw us, would anyone else live here, no, there is nothing here, we are stuck 5 miles outside of the city with no buses or shops or houses or anything, the only thing that is out here is the rubbish dump next door, nice” |
| Lee F. Monaghan, Jonathan Gabe, | Illustrate how health identities are negotiated among young people diagnosed with a chronic illness, asthma impact minimized, importance of physical play, sport & diet, nutrition and appearance.  Importance of outdoor play, physical fitness & health associated with play, identifying as Travellers with strength & fitness , boys & girls play differed, impact of halting site restricting outdoor activities | Most respondents emphasised play, physical activity and sports as aspects of a healthy life which they often embraced and even excelled at. Travellers could be fairly vocal in this regard  What made you choose that name?Cass: It’s a name of a horse that my daddy had one time tha twon [lots of] races.Interviewer: And what kind of a horse was Cass the Bad Ass? Cass: A very fast runner. Big, black,fierce. Strong and fierce fast.I nterviewer: Are you a fast runner too?Cass: The fastest boy on this [halting] site, I can tell you that here and now. Interviewer: Do you guys have a lot of races?Cass: We do be always race’n one another. We go up there to them fields and we run like our lives are depending on it. Most of the boys are fast enough too, mind. Interviewer: Do you like other sports?Cass: Yeah. Swimm’n on Saturday mornings and me and the boys play football nearly every day.  Kelly (F17T) who reported taking medication for depression and expressed boredom with her life on the halting site .For her, walking in the fresh air:‘gives you a bit of time to yourself and when you’re out you just feel cleaner and your head  Physical activity was gendered with boys talking about football and rugby while girls mentioned playing on bikes and walking with friends. Some Travellers claimed they were healthier than settled people by virtue of their preference for outdoor activities, despite evidence of health inequalities and high rates of asthma (All Ireland Traveller Health Study Team,2010 |
| Levinson, M | The meaning of that which is learned at home goes beyond the actual knowledge itself, and is integral to a Gypsy sense of identity, according to which, life skills and occupation are part of a concept of being more than doing  Learning through role play, "economic activities" trying things, relationship with identity and community | Watching fathers dismantling scrap. Subsequently, they seemed to experiment and learn through imitation, dismantling toys with hammers or other tools that come to hand. Sometimes identified by outsiders as destructive play (Department of Education and Science [DES], 1985; Taylor, 1988), it could equally be interpreted as constructive learning  It is in this light, perhaps, that it is necessary to consider the dismantling of a play-bus I witnessed, when the driver watched, impotently, as children unscrewed panels from the interior (see Levinson, 2005). Distinctive orientations to surrounding environments are also evident. Considering perceptions of tips, for example, it has been observed that a Traveller will see ‘not a rubbish heap, but copper, glass and aluminium’ (O’Boyle, 1990, p. 136  While observing parents and other older family members engaged in specific tasks, children are often being inculcated with secondary skills.  *I was just messing about with this engine and told Billy [J.R.’s son, age 7] to change the plugs. They didn’t need changing or anything; I just wanted to see if he could do it. (J.R., 2)*  *I’ll probably put the children through school. But I wouldn’t feel safe with them at play-group. Besides, you learn more stuff at home*. |
| Levinson, M,.Sparkes, A | Tensions between performances of masculinities and how they are valued differently in different contexts Fighting as a crucial signifier of masculine identity, importance of Travellers sticking together- disrespect for gadje's who do not, fighting and sex- bravado, younger boys experience of bullying, gender differences, working at young age. | While the men tell stories of fights outside pubs or around sites, boys give accounts of incidents in the playground or outside the school gates. In both cases, there is much exaggeration and posturing, injuries are reported in graphic detail and old scars shown with pride. The second pattern involves sudden inter-group outbreaks within school, usually after a playground dispute, during which divisions are almost invariably on Gypsy versus non-Gypsy lines. Group solidarity was often seen as a distinctive feature of Gypsy society: *So there was a fight. It was Jimmy’s fault, really, ’cos he’d picked on Deano(non-Gypsy boy) by mistake, ’cos it wasn’t even Deano who called him names. But once it all started, we all twatted ’im, anyway. I nutted ’im—here, you can still see the tooth-mark.*  Thus, many of the men interviewed, particularly those in their teens and 20s, appeared to revel in their memories of confrontations at school as it provided a forum in which they could affirm and confirm a sense of masculine pride. *Now I’ve left I miss school. I hated it then. But now with two kids and a missus to scavenge for. At school I had no worries. It was a laugh. The kids took thepiss and all that, called us names. We never took no notice; well, sometimes ,if they got too cocky, me and my two cousins kicked their heads in. I don’t ’aveany grudges against them. Sorted it out when we were kids.*  Gadjes never stand up for each other. (Liam, aged 13)Sue (aged 10), Liam’s cousin, was also scathing about the lack of group solidarity among non-Gypsies, appearing to see nothing contradictory or paradoxical in her observation that ‘although we fight amongst ourselves, we always stick together’. As in Duke’s case(see earlier), rare exceptions to these patterns were reported by Gypsy youngsters involving outbreaks of inter-school violence, when they allied with non-Gypsy pupils against (non-Gypsy) pupils from a rival school. At times, there has seemed a certain brittleness in this sense of superiority; although weakness has rarely been acknowledged, a few of the younger boys have confided that fear of bullying from non-Gypsy boys has led to a dread of school. For example, Robbie described .. writing, drawing and playing games’, said that, nonetheless, they would prefer to be at home, ‘out “lamping” [catching rabbits] or picking mushrooms’. insisted that they would never tell their parents about all the ‘fighting and pinching’. Richard, their teacher ,suggested subsequently that the boys were ‘*not untypical’* and that many of the younger(Gypsy) boys seemed passive at first, though often becoming more aggressive as they grew older. Supporting this view, Wayne (aged 11) stated: ‘I used to get upset when people called me “Dirty Gyppo” and names like that, but not any more. Now if anyone says it,I’its ’em  In the context of in-group relations, the problem can be more serious. Lenny (aged 16) has got a reputation with the girls. Estelle (Lenny’s mother) informed me that some of the other mothers had complained about his behaviour:*If their daughters do something they didn’t ought to, or if they don’t look after their daughters proper and watch what they’re up to, who’s to blame for that? Am I supposed to look out for their girls*?  The older I got, the more I thought what the fuck am I going there [to school]for? I wasn’t learnin’ nothin’. Not like with Jake [Jimmy’s 9-year-old brother].Imean I was out working with Uncle Bob most days and the other kids was coming in there [to school] bringing in toys to play with. I swear. I practically ’ad me own business and pussy every night. As much as I wanted. (Jimmy,aged 16).  *The parents are very protective. You need to write for special permission for any school trip. They reject sex education. They really want to protect their children from the loose morals of the outside world. They don’t want pregnancies ... Having said all that, when it comes to the boys, it’s quite common for them to be sexually active at an early age. (Anna, Primaryteacher.)One of the most salient features of conversations with younger boys was a pre-occupation with sexuality for its own sake. This tended to manifest itself in the form of bravado.* |
| Levinson, M,.Sparkes, A | Importance of movement to Traveller identity-tendency to romanticise also-view settling with assimilation. Lifestyle changes are leading to fragmentation within communities and even families- nomadism served important functions-. The manner in which spatial organization frames social relation-ships is highlighted. Throughout, there is reflection upon the ways in which Gypsy identity is actively constructed in relation to space  Preference & value for outside , boredom leading to drug use, unsafe sites, impact of site culture on social interactions, gender differences | Nevertheless, there is virtually complete agreement that being outdoors is preferable. Younger participants have alluded to the lack of restraints,the sheer physical pleasure derived from the freedom to roam around, the freedom to do things that were forbidden in the home, the ease of access to cousins and friends, and not least, the opportunities to strayout of adults’ eyesight  *There’s nothing much to do when you stop travelling. You get bored. Take my brother. ’e got addicted to smack. I’ve seen ’im ’aving a fit.Bloody scary. I smoke a bit of dope, that’s all, but ’egot into these raves:ecstasy; speed. All us young ones are into dope a bit. The older Traveller men, blokes of 35 or 40, they’re all dead against it. My father would ’avea fit if he knew. (*Duke, age 20)  Among children, however, opposition to houses was stronger among girls, invariably on social grounds:I wouldn’t like to be a Gadje—’cos when you live in a ’ouse there’s nothing to do; but when you’re on the site, you’ve got all your cousins. You can play around all night long, play hide-and-seek. And you can see grandmas and grandpas. (Victoria, age 11) Boys more ambiguous-We moved into a house about 2 months ago. Yeah, it’s great. Lots ofs pace. Only I miss my ally [aluminum] sometimes. I fix metal. Collect it and fix it. Used to get a lot of money. You take it to the scrapyard, see. Copper wire’s best. Me dad got 3,632 quid once. Just for scrap. Old metal. We went out on the fair; it was great. Bought a new caravan and anew motor. We might go back to a caravan one day. (Arthur, age 11)  Site G., formerly the location of a municipal rubbish dump, had been the subject of an application a number of years ago by a local golf club seeking planning permission to build a course. This was rejected on the grounds that the area was deemed to be unsafe, investigations suggesting too high a level of toxicity in the environment for permission to be granted. Such a situation might seem extreme, but it is not unique: many sites are on land that is not only surplus to the requirements of the out-side society but also dangerous; such is the nature of existence “on the margin” (Shields 1991).  Site culture is a culture of its own. As John (age 40s) noted, *You ’aven’t got the same kind of freedom; you’re stuck in one place. . . .The type of friendships you set up are more permanent than on the road.. . . Gang culture tends to set up on sites in a way it wouldn’t on the road.*  The rivalries that emerge in such contexts embrace entire families. A number of children referred to antagonisms between themselves and other children on the same sites, which were quite regularly carried over to the school environment. When asked why they disliked the other children concerned, most either shrugged or alluded to arguments involving parents and/or other family members. On just a single occasion (out of nine discussed) was any reference made to some characteristic or action on the part of the other children as the source of the feud. Not only did this affect socialization patterns, but it also influenced on-site movements. This typically entailed the avoidance of certain trailers and the immediate spaces around them. Off-site, too, there could be amendments as to places visited. Two young men, for instance, aged 18and 17, observed that they no longer went to a certain local pub as a result of a family feud, selecting another pub despite reservations about the management and clients, who *“would like to see all Travellers put down.*  These zones operate within the following:  (1) within the trailer, within which a limited amount of space demands the maintenance of a relatively strict regime; (  2) the vicinities of the trailer, around which the child will be engaged in numerous activities and where most of the movement is relatively unrestricted; and  (3) the area bordering the site, where the child will seldom venture alone. toddlers observed moving independently between caravans- free to wander within boundaries.  Children always supervised and around others. *Our kids are brought up never hearing or seeing bad things. They’re protected. Yesterday there was a man by the gate. Took off running when he was spotted.. . . They can play out in the open. We’re not afraid for our kids to go out and play. If there were 100 caravans here—there’s a load of Irish people here now. I know our kids won’t get touched. (Heather,age 50s)You see Gadje children. And they’re off around the streets, here, there and everywhere, and their mums and dads neither knows nor cares. And there’s all sorts around: rapists, them pedophiles you hear about on the news....We don’t let our kids wander off, they get looked after proper.(Jolene, age 20)* |
| Levinson, M,.Sparkes, A | The findings suggest that, at the individual level, for many young Gypsy women, the different demands of home and school can lead to feelings of cultural dislocation and anxiety. At a group level, the widening of aspirations constitutes a challenge to structural patterns and traditional value systems that have underpinned both family and communal life  Close bonds between generations of women & girls, gendered separation of domestic tasks, young girls engagement in domestic chores, enjoying fashion, make up, descriptions of gadje \settled girls as babyish or promiscuous, sticking together s Traveller girls, reduced opportunities as youth for community engagement-protectionist | Last night? I’m trying to remember. Oh yes, I helped Mum and Dad. I help Mum cleaning. I’ve got to get up early every morning. Well, I don’t have to. I set my alarm, which I keep under my pillow. My sister’s alarm, actually. Mine’s too loud. I set it for 5 o’clock. I like to get up at 5 and do jobs. I finish work at 8 o’clock when it’s time to get ready for school.I clean the front room. Then my brother’s room. And the bathroom. Then anything else, any other jobs. (Katie, aged 8)  They sit in class in front of the boys with their legs wide apart. They’re slags. (Serena, aged 9)T.hey’ve always got their legs open. In lessons, at lunchtime. They don’t know what itmeans. (Victoria, aged 10).There’s two types of them [non-Gypsy girls]. They’re either very silly, babyish, or they’retarts. They only know one way to attract boys. (Melanie, aged 15).Most criticism of non-Gypsy girls has been for immodest behaviour, but on occasion,they have been mocked for a lack of sexual experience. One group of Gypsy girls(aged 9 to 10) derided their non-Gypsy counterparts for being ‘virgins’ and for playing ‘babyish games’. As for themselves, they preferred games such as ‘boyfriends and girlfriends’ (Seline, aged 9) and ‘kissers and shaggers’ (Roseanne, aged 10). Although there may have been some degree of bravado on the part of the girls here, an interesting distinction they made was between the world of pretence created in the games played by non-Gypsy girls as opposed to the real, more adult world, they perceived themselves to inhabit. They provided an example: Sometimes they [Gadje girls] sing or dance at the front. They think they’re ‘The Spice Girls’. We listen to them but we don’t think we are them. That’s babyish. We’re into fashion. We’ve got the clothes and the posters. But we don’t think we’re nobody else.(Roseanne, aged 10)  Gypsy girls have usually seen themselves as more responsible, more knowing, and more importantly, more loyal and supportive towards one another. Comparing her own friendships to those of her non-Gypsy classmates, Tara (aged 13)suggested: ‘We never bitch about one another, we don’t try to get the better of each other, and we never let each other down’. A growing awareness of lifestyles among their non-Gypsy peers has led to comments such as ‘they don’t know how easy their lives are’.  They didn’t go home after school and feed Beauty (Jade’s pony), or look after Tony(baby brother) and play with Larry, Petesy and Nina-Jane (younger brothers andsister), and fetch things, and help Mum clean up. ‘You can talk about things’, she suggested, ‘but it’s not really like that in real life’.  Kelly-Rose and Kina (aged 15 and 13),could do as they liked, ‘so long as they don’t bring any shame on the family’. She then suggested some of the places which were proscribed; ‘No pubs or clubs. None of those discoteques. Nowhere they might pick up drink, or drugs, or boys we don’t know’. At which point one of the girls interjected, ‘It’s true what she says. We can do what we like So long as it’s what she (their mother) likes as well’  (aged 6) said that, as soon as he got home, he went out to play or settled down to watch television, while his sister helped with jobs. ‘That’s what girls are for’, he added. When teacher asked boy to help at home..*he can be easy-going ... pliable ... then quite suddenly, apparently without reason, vicious’.* However, evidence from younger Gypsy boys suggests that, far from being ‘without reason’, behavioural changes occur when they feel slighted or demeaned, when, in effect, the construction of their own masculinity is threatened. |
| Levinson, M.P | The interface between play and identity in home and school contexts, in particular the role of play in “authoring the self” (Bakhtin 1981). T | In observing children at home in this study, the norm was for children to be in mixed age groups, an aspect that would appear to shape play patterns. There are further, deep-rooted social factors underlying play patterns. For example, children are rarely alone. Anna (in her sixties) was one of a number of older participants who suggested that it was not “natural” for children to play on their own, an attitude also noted among Spanish Gypsies (Carter 1996).In general, children encountered were in the company of friends, older sisters, aunts, mothers, or grandmothers, and this was an inevitable factor in the ways they played. The impression was that for the most part, the interactions with those around them took precedence over the engagement with toys, and despite the lack of any “hard” evidence for this, there was corroboration in comments made by outsiders: *Gypsy children don’t play games; they reenact life. (*Theresa, primary school head-teacher)  Although some children spoke of playing games at home, their games often seemed to merge into work, a feature that was confirmed by other observers*: Location comes into it. I don’t know if Gypsy children play much on site with siblings and neighbors. Their lives involve many grown up activities, “real” preparation for work—from caring for horses and other animals to repairing and maintaining vehicles to cutting logs to preparing meals and caring for the trailer as well as socializing with visitors. (Miranda, fieldworker*).  On a number of occasions, adults reported that children were out “playing,” yet subsequently, it transpired that that they were, in reality, doing jobs to help the family. This might have been because parents did not want to give the impression that their children were exploited; alternatively, it might derive from a different perception of “playing.” Children themselves tended to be divided between explanations of playing and helping when reporting their activities on such occasions.  A growing number of children would appear to possess their own television sets and computers, and many children have possessions that non Gypsy children would be less likely to own, for instance, animals such as chickens, goats, and horses. On one site, a boy, no more than fourteen years old, was keen to show off his car. At another site, two boys, who were younger still, brought out their motorbikes. A few girls produced expensive jewelry that they had been bought. What seems significant is not merely the value of such items but that these things were not representational; they were all real. Similarly, children were regularly observed “playing” with things that would not be considered as “toys” in wider society—mechanical items, bits of engines, and so forth. In general, there seemed to be few toys, which is not to say that dolls, teddy bears, and other toys were entirely absent. In some homes, the children seemed to have far more toys, and the parents in such cases often remarked how they themselves had never had such things. Overall, there were very few books, though quite a few children had videos. At times, there was a suggestion that there was no reason for simulated play when there was the option of something more authentic: *Our kids have real things to play with—you know, like animals to look after and bits and bobs of old car engines to repair—not dolls and toys. See, so they’re out there learnin’ about proper things, you know, what’ll help them get on in life, while Gadje kids is just playing about, all babylike. (Julie, aged nineteen)* .Fieldworkers reported that the children they worked with preferred real items, such as gold, clothes, videos, and horses, as presents rather than toys or games. They reported, too, almost unanimously, that when toys were present, they were treated with a complete lack of care finding also noted in the context of Spanish Gypsies by Gay y Blasco [1999]). During observation in this study, although toys were not witnessed in the process of being broken, broken toys were frequently seen. And while attempts were not made to measure the precise amount of time children spent with particular toys, the general impression was of things being discarded after brief periods of play  It seems significant that some of the youngest children observed appeared to show a marked preference for toys and books that made reference to their own background, such as jigsaws depicting traditional Gypsy scenes, model horses, tractors, and books about the lives of Gypsy Travelers |
| Levinson, M.P ;Martin P | The article explores attitudes across age groups, highlighting social reasons for resistance to literacy, and argues that policy makers should consider effects on group membership and ways in which formal literacy can constitute a mechanism for disempowerment | Another issue was the way in which Gypsy children were described as colonizing particular playground areas  The parents of Crystal(age 11) stated that although it was necessary for children to go to school, once they got home, they should be outside, playing (“*That’s our way: natural, healthy*”). Yet whereas several participants articulated the view that it was *“unhealthy*” for children to remain indoors, it seems significant that this complaint was always made in the context of homework or reading and never with regard to television or video games. It may be relevant here that among many families, although children often have their own television sets, there remains the perception that watching television is a family/communal act, whereas reading is an individual/solitary on  *I don’t remember having any books at home as a child, so the only opportunity I had to read was at school. I found it easy and it became my favourite pastime. I do remember, however, some problems being able to read caused: the other travelling children gave me the nickname“Bookie” because I’d much rather read than play. (Ruth, age 30s).* |
| Mason, P; Broughton,K. | The limited capacity of the service to address issues beyond the immediate demand for play and leisure opportunities amongst Gypsy/Traveller children was a key characteristic of this initiative. In the context of the social exclusion experienced by Gypsy/Traveller communities, the lack of strategic focus left the activities and support provided unsustainable, being dependent upon Children’s Fund (or alternative) funding rather than developing more inclusive mainstream service  Lack of play provision, parents identifying importance, service provision not strategic and not addressing complexity of issues including structural, economic and racism | Whilst provision and policies varied, none of the sites covered by the service had facilities or play areas for children or young people.  Central to the service was the lack of play and leisure activities available to Gypsy/Traveller children across the region. There were several, interrelated reasons identified by the Consortium for this:  •Gypsy/Traveller families are isolated from both mainstream and neighbourhood-basedprovision, either because they live on sites that are physically isolated, or are housedbut isolated from the rest of their community;  •families and children lack the confidence to access services due to discriminatoryexperiences and fears about this;  •services are unaware of or unwilling to work with local Gypsy/Traveller communities;and,  •(mobile) Gypsy/Traveller families lack knowledge of local service provision  Parents saw positive impacts from even the simplest activities for their children. But there were practical barriers to families accessing services in addition to cultural and capacity issues: Income, lack of transport, suspicion. Some common problems emerged, usually around issues of taxi or minibus providers being reluctant to travel to sites, allegedly because of their geographically isolated nature or due to their perceptions of Gypsy/Traveller children and fear of damage to vehicles or even staff. A central issue identified in the development of the service was that low confidence, suspicion and fear expressed by parents (again, usually mothers) prevented them from engaging their children in ‘mainstream’ leisure activities that might build resilience and promote social inclusion. Although NECF findings suggest that some parents do indeed have these fears and suspicions, stemming from direct experiences of prejudice and discrimination, these issues are complex. One benefit of the service reported by mothers was the respite provided when children were taken off site or away from their house. Int hese instances, the service was working to a different set of concerns than those held by parents. Low literacy levels amongst parents was another difficult. Parents joined with improved outcomes  The benefits of attending leisure and other activities were clear to those parents who used the service, and to the children themselves. Nonetheless, although some children continued to access services and activities independently, positive experiences were not enough to enable Gypsy/Travellers to increase their use of services, due to the complex combination of factors outlined above. What was lacking across all of the areas where the service was delivered, was accessible, cheap, local provision or provision which reached out to Gypsy/Traveller communities.  The service was able to demonstrate few inroads into challenging the prejudice felt by members of the settled community, but nevertheless some significant actions were taken. But, as this objective was always regarded as a hoped for benefit from the direct work with services, it was limited by the constraints of that work itself. As we have described, the work with services was ad hoc rather than strategic. The activities for Gypsy/Traveller children organised as a result of limited local facilities, by their nature, did not bring them into contact with other local children  As within any other community, there were differences in the importance families attached to education, to work, to leisure, to gender roles and other facets of family and community life. |
| Myers, M; McGhee, D; Bhopal, K | The research demonstrated that many families felt their children could learn skills at school and that would be necessary to generate an income in the future. This adaptation towards schooling designed for a sedentary population carried with it a large degree of concern from the point of view of Gypsy and Traveller parents around issues such as cultural erosion and safety, (issues that in the past may have led to many children not attending school).  Traveller community is safe for children , boys moving to working roles, tension between keeping culture & mixing, going to school. In school experiencing bullying or being the aggressors -usually in response to bullying. | Mary, an Irish Traveller noted that both she and her children are called ‘pikeys’ or ‘scum’ on a regular basis and her children have been called ‘dirty pikeys’ or ‘tramps’ by their school peers. Gypsy and Traveller parents also ‘*want acceptance, they want equality, they want an end to discrimination, an end to bullying and racism and to know that their children will be safe and happy and nurtured within the school envi-ronment’*  *The ‘village’ was a place where, you can wake up in the morning and out the window you hear birds. It’s really quiet. It’s lovely. Even the kids when they come out to play; you’ll get two maybe four kids, and that’s about it*  According to George*, ‘it’s the social side of school that the travelling children don’t cope with’. This was not a problem for boys who would leave school to work with their fathers at around 13 or 14, but was a big issue for girls who were exposed ‘through mixing, talking and chatting’ to the lifestyles of gaujo teenagers*. He described the tension for young people coping with two lifestyles and two moral codes, *they are in misery because they got to acquire the two cultures. They’re in two things, right? They’re trying to adapt to the children at school right? ... [but] ... they can’t cross over because there’s a line what they can’t cross...*This tension and dissonance between the two cultures causes trouble, either Gypsy and Traveller children being bullied or becoming the aggressors (usually in response to bullying or name-calling).  Many of the parents interviewed stipulated their children were not allowed to go and play at non-Gypsy and Traveller houses. George explained how his daughter brought friends home to play when she was at primary school but was not allowed to visit other children’s homes because of safety concerns, *My daughter when she was at [primary] School, had her friends come back for tea, my sister’s boys have their friends back for tea, but their children don’t go back in return and we explain that to the parents. We are very sorry. Your children can come to us, but we don’t let ours ... because a lot of these parents live on main roads and housing estates and places, you know* |
| O’Sullivan,C;Maguire,J;Hayes,N;O’Sullivan,S;Corcoran,L;McKenna,G. | Increased access to the arts, outdoor play and well-being between Traveller children and mothers was documented through audio recordings, still photographs, artists’ evaluations and semi-structured interviews. Positivity re: ideas for home, more outdoor & arts play, parents as play partners, creation of memories, recognising children as capable, | Exchanging ideas: Looking for ideas for home-. *She thought it was fun and loved the idea, of the whole idea of mess, squishy’ play (SSI June 5 2013).* Other examples  The centre was in stark contrast to the Traveller sites, where many of the families live, which are characterised by concrete spaces and a scarcity of flora and fauna  Traveller children’s indoor space and outdoor play opportunities are severely limited  Outdoor play *Cathleen noted that she was now ‘bringing the toys outside for the boys, there is a tunnel that they can go through’ (SSI June 6 2013). By contrast, before this she was ‘constantly going [i.e. always doing something], but I actually sit down and do things with them now’*(SSI June 6 2013).  During the project both artists documented numerous exchanges between mother and child that were musical, creative and playful.  Changes in play supports as parents, children more capable, creation of memories cultural  Importance of sharing of Food in sessions |
| Piazza, R. | As these women conceptualise place in terms of what it can provide for their families and community, their often idealised conceptualisation of locality resembles a Foucauldian ‘heterotopia of compensation’, in which the meticulous functioning of the site protects the community and defends it from outer contaminations. | Protected within the site- fear of others and prevent mixing, ‘here’ is evaluated positively mainly on the basis of the affordances that come with it, in particular the play bus that entertains the children every Wednesday afternoon with books and games  More importantly, the women conceptualise the site as the perfect heterotopia within whose neatly designed borders the travelling community can raise its children without the risk of them mixing with the outside world,  Isobel*: I’d be afraid [of living in a house] in case the kids ever started mixing with …P: Yeah … with who. Isobel: Like just getting … mixing badly to be honest like the way we are here our kids mixes with each other and they know, well they know who they are. Elaine: Yeah everybody, I like everybody … the kids agree, the kids all have friends here*  *Isobel: Yeah … and … the play bus comes out for the kids. P: What’s that?. Isobel: It’s just like err on every Wednesday at quarter past three a big bus comes out for all the kids it’s like and after school.P: Ah ok. Isobel: Full of like books. P: Ah ok.Isobel: A few of them like that. P: Un huh. Isobel: And and.. it’s for all the kids. All the big kids all the little kids. Just for things to do* |
| Rose, A. |  | On the day of the visit such activities included making St Patrick Day cards, playing a guessing game and learning a new nursery rhyme. For Teresa, the sessions gave her ‘*...things to do with them at home’*  According to the local home-school link officer2, *such difficulties on the estate had ‘...led to the exclusion of the Travellers from the rest of the town’.*  However, there was evidence from the mothers that they already engaged with craft-making activities at home. Sarah, pointed out, ‘...we do these sort of things at home anyway’ but for others, for example Rosa, the session provided aspace for such activities that was not always available at home, ‘when you are at home with the kids you don’t get the time to do this...’.The mothers said their children were ‘curious’ about what they had been doing andlearning while at the sessions, ‘...they keep asking me “what did you do today”?’(Sarah). Some of the mothers took the opportunity to share their learning with the chil-dren ‘when you  The children were particularly interested in the crafts, such as cards andnursery rhyme books that the mothers took home to them. One mother talked ofhow ‘proud’ she was to take them home and share them with her children. Anothersaid she took her daughter home a ‘surprise’ every week. |
| Van Hout, MC | Traditional anti-drug Traveller culture is diminishing in potency, as families become fragmented and Traveller youth assimilate within educational settings, and over time one would question if drug use among Travellers will replicate or even exceed that of the ‘settled’ population, given the marginalisation and discrimination they experience. | Traveller youth reported feeling excluded from after school activities and sporting club One would also note that it is in the unstructured leisure time that the risk for drug use is greatest (Collingwood et al.2000).‘I want to fit in...I ain’t going to say I won’t do it...if the lads are out there gettin abuzz, whose to say I won’t neither...’ (Traveller youth)  The Travellers reported a clear sense of old Traveller values being replaced by those of the ‘settled’ community among the youthful generation. Experiences of selective acculturation along the continuum of assimilation perhaps pose the greatest risk for younger generations of Travellers who experience cultural confusion and cultural shame as they strive to integrate within schools and form friendships. This may very well be the case for Traveller youth as they navigate modern sedentarist associational life and subscribe to the understanding of drug use within. Critical Public Health213 A consumptive framework of accepted subterranean leisure values in the post-industrial society (Matza and Sykes 1961, Young 1971, Cohen 2002, Measham and Shiner 2009). Within the dominant sedentarist discourse, is this new drug-taking behaviour a response to stress, boredom and depression, or are the wider forces of Traveller social circumstance predicting such behaviours? Drug activity within the Traveller community may be therefore seen as attempts to seek recognition or status within groups by the so-called illicit means, the creation of new space or new cultural capital, and when applied to the older Traveller generations, resilience to drug and alcohol use may be viewed as attempt to counteract dominant values.  ‘*Me house was sprayed with paint...get out f**** pikey (slang term for Traveller)...no one spoke to me when I was going around me business...my kids are upset...they have no one to play with...it’s hard...but it’s harder to go on the road’. (Traveller)* |
| Vanderbeck, R. | The repression of semi-nomadism through controls on spatial mobility (and the consequent damage to semi-nomadic economies and lifestyles) creates logics for state and voluntary sector “care” and intervention. Social welfare and human services contexts have important implications not just for young Gypsy-Travellers but young people more generally, and especially young people who are constructed as ‘socially excluded’, ‘marginalised’, ‘disadvantaged’, and so  Separate service provision- fears of mixing- protective parenting- children steered towards certain activities. Youth service. Parents wish for ages groups to be mixed- not allowed. Parents & staff reporting more mature group of children- staff however reporting wish for children to engage in more recreation\leisure...child describing preference to help his fathers & brothers. | *Below, she recounts her attempts to increase participation amongst Irish Traveller young people at one site where, although a few children participated in the playgroup, no one regularly participated in the YWP or SDP.*  The playgroup, for example, was an alternative for parents who could not or would not access ‘mainstream’ playgroups; it offered a flexible, free service where children were with other Gypsy  The YWP offered access to recreational opportunities for young people who felt uneasy about or excluded from using what local provision existed (such as youth clubs nearer to home)- so steered towards predetermined choices  *Youthworker Sam, youthwork student Clint, and I discussed plans for a YWP session (mostly with youth from Site B but also two boys from housing) for next week.We collectively made a list of potential activities, including indoor football, swimming, bowling, arts and crafts, and a photography projectSam noted that he wanted the young people to spend at least some time over the next month working on GTC’s new computer equipment,I asked how we would finally decide what we were actually going to do next week.Sam said that he and Clint would go over to Site B tomorrow “to find out what (the youth) wanted to do.”He then explained, “We can make some choices and present them and say, ‘Are any of these things that you would like to do?’If we just go and ask them, they’ll say ‘the cinema’ or something ridiculous [...]This way we’re sort of giving them choices [pauses, then speaks more softly]I really don’t like doing it that way” [i.e. presenting young people with a predetermined set of choices].After some discussion, indoor football was decided as the most promising activity for next week.Sam pointed out, “So the week after [after having played football] we can say ‘We played football last week, why don’t we go back to (GTC’s office) this week?’Then we can work on the computer or something.Smiles]It’s like bribery really.”(Fieldnotes*)  Marie (age 14) and I were chatting about the day’s activities, and she pointed to a group of visitors (from other local agencies) and saidto me, “It would be better if the gaujos weren’there.” I asked her why and she simply said that it would be more fun.  Don had previously expressed his objection to the ice skating trip because he thought it was a bit dangerous and said*, “If they fall and somebody skates.Don protesting that he no longer let Jack ride the go cart, and that he always wore protective gear when boxing.After a few minutes of this back and forth, Don agreed over his fingers, they can get cut right off.”He said that there was no way that he was going to let Jack go.Bonnie playfully asked Don how he could let Jack go boxing and gocart riding without a helmet but not ice skating [these were not YWP  activities but things Jack did in his own time]*  Sandy had completed her first year of school but had stopped attending regularly after an incident where (just as her mother had long feared) she had been injured on the playground due in part to lax supervision  In several instances, Nan asked if Sandy could return to attending the under 5s playgroup instead with her younger sister, but this was prohibited by the funding terms and legal conditions of the playgroup’s existence. Nan’s request was in fact a common one, as a number of GTC’s users saw no legitimate rationale for the age boundaries that were enforced around particular activities for young people.  Parents & staff described Traveller children as more mature than settled- Staff, however, often had conflicted feelings about this, harbouring particular notions about the kinds of recreation, play, and social activity in which young people of certain ages should be engaged.She explained that most days he is off working with his Dad and brothers, and has assumed quite a lot of responsibility within his family. Bonnie remarked *“It’s nice to see Ernie be a kid for a while*”.I had in fact chatted with Ernie earlier while the two of us were queuing for a ride.If anything, he had seemed really pleased to be going out regularly to find work with his older brothers, whom he clearly admired(Fieldnotes) |
