# Supplementary material for: Irish Traveller Children’s Play: A Scoping Review
Source: Springer Nature journal article supplement (doi:10.1007/s10826-023-02695-w), 2023-10-12
Supplement: MOESM3 [file 26173284]

**Scoping Review: Charting of Data using Finney & Atkinson’s Framework**

| **Factors Influencing Irish Traveller Children’s Play** | | |
| --- | --- | --- |
|  | **Enabling** | **Restricting** |
| Individual | **Personal Identity**  Devine & McGillicuddy, 2019- Comfortable to share identity-club participation.  Brunnberg et al, 2015- Right to enjoy own culture identified as priority right.  Levinson & Sparkes, 2003- Loyalty to each other & little regard for outsiders perceived lack of loyalty  Levinson & Sparkes, 2006- Loyalty to each other other & little regard for outsiders perceived lack of loyalty  Levinson,2005. Play –fighting related to status, sticking up for self  Levinson,2005- Group solidarity-we always stick together  Levinson, 2005- Girls perceiving selves as grown up- more real world adult games    **Playfulness & Play Preferences**  Devine & McGillicuddy,2019- Playfulness with younger sibling.  O Sullivan et al, 2018- Musical, creative & playful exchanges between parents & babies  Forkan,2006- Enjoy PE & Art& playtime  Vanderbeck, 2009- Children describing wish to be involved with work  Lee et al 2016- Physically fit, healthy, strong  Levinson & Sparkes , 2003 & 2004- preference for outside  Gray & Donnelly, 2013- playfulness with mother  Levinson 2005- Preference for toys that made reference to own background  Levinson 2005- little interest in games that required turn taking, rules, concentration  Levinson 2005, All enjoyed hide & seek  Levinson 2005- Resisting dominant school rules by not playing games  Levinson 2005- preference for social interaction, playing in twos and threes    ( See play descriptions) | **Personal Identity**  Devine & McGillicuddy (2019) (initially hid identity at GAA club.  Levinson & Sparkes, 2003- Fighting part of masculine identity  Cavaliero, 2011- Parents perceived children as messing together in classroom & being sent home for same.  Monaghan et al 2016- Bored on halting site, mental health  Joyce,2015 Bored  Hurcombe et al 2012. Young males become youth at risk  Levinson & Sparkes, 2004- Bored youth- drug use  Levinson & Sparkes, 2004-relationship between identity & movement – how space is used-.  Levinson & Sparkes, 2003 & 2006 - loyalty to each other & little regard for outsider perceived lack of loyalty  Van Hout , 2011- Boredom due to lack of leisure opportunities.  Boyle,Hanafin & Flynn 2020 Tension between revealing identity or adapting in terms of belonging  Myers, McGhee & Bhopal, 2010 Tension living between two cultures for children in school  Levinson 2005- Resistance in schoolyard helpful to cultural identity & community membership-conformity may be detrimental  Levinson 2005- Children shouting running around, taking bus apart, answering youthworker rudely on playbus    **Perceived characteristics**  Cemlyn 2000- Practitioners perceive children running wild  Brown 2017- Perceived ability level further excluded  Vanderbeck, 2009- Youth workers perceived youth as too engaged in adult world of work.  Levinson & Sparkes, 2003- Bravado among younger boys- preoccupation with sex.  Murray, 2012- preschool viewing child as bold and boisterous  Levinson 2005- Teachers – wild, not concentrating, violent macho like at home , dominating , uncontrollable, grown up. |
| **Role of Others**  **Societal** | **Siblings**  Cudworth (2015)- Siblings looking after younger siblings in school playground  Cavaliero (2019) Sibling child care influences games between ages  Forkan , 2006- Playing together in schoolyard  Piazza,2014- Children play together  Vanderbeck, 2009- in playgroup  Levinson & Sparkes, 2004 Playing between ages  Levinson & Sparkes, 2006- Playing with siblings  Hamilton, Bloomer & Potter,2012 Traveller children look out for younger ones  Levinson , 2005 Playing together all ages the  norm      **Family Support\ Play & Learning & Everyday**  Devine & McGillicuddy (2019) Play within loving family  Levinson 2008- Parents supporting learning through play- to try things out  Levinson 2008- Identity & learning through doing “economic activities & role play’ important relationship  Levinson & Sparkes, 2006- Close intergenerational bond between women  Levinson & Sparkes, 2006- Young girls engaged in domestic activities  Gray & Donnelly, 2013. Mother preferred play partner- responsive playing with child with ASD  Mason & Broughton, 2007 Parents describing importance of play & leisure  Rose 2013- Parent supporting play at home –arts & craft, rhymes  Levinson & Martin 2007 Parents describing importance of outside playing- however when speaking in terms of reading rather than watching t.v & videogames  Boyle, Hanafin & Flynn, 2018 Parents supporting activities at home- pride in children’s engagement  Levinson 2005- Play- fighting learning as preparation for life    **Wider Community Belonging**  Devine & McGillicuddy (2019) (GAA club belonging-initially hid identity)  Murray, 2012 Preschool following diversity training included child’s interests and supported play  Boyle, Hanafin & Flynn, 2018Segregated preschool supporting belonging  Boyle, Hanafin & Flynn, 2018 Parents describing importance of children mixing in preschool        **Collective identity\Community Norms\Culture**  Devine & McGillicuddy (2019)- Caring for horses central to Traveller culture & identity  O Sullivan et al (2018)- Importance of sharing food  Levinson 2008- Identity & learning through doing “economic activities & role play’ important relationship  Lee et al 2016- Importance of being physically fit & healthy to identity supports outdoor play  Levinson & Sparkes, 2003- group solidarity, sticking up for each other  Levinson & Sparkes, 2006- group solidarity among girls  Gray & Donnelly, 2013- Prefer to play together  Boyle, Hanafin & Flynn, 2018- Inclusion of parents in preschool supported belonging  Levinson 2005- pPay involving economic and domestic tasks-playing & helping  Levinson 2005- Not natural for children to play on their own- spending little time on won  Levinson 2005- Playing with real things more than toys- little value associated with toys  Levisnon 2005- Valued being with others over games  Boyle,Hanafin & Flynn 2020 Parents describe importance of mixing with settled  Hamilton, Bloomer & Potter,2012 Traveller children able to stick up for themselves  Levinson, 2005  play as learning, play as cultural reproduction, play as imitation, play as  enculturation into rules and norms of society, and play as a site of contested power relations in which children challenge dominant modes of control.  Levinson, 2005 children use play to express a separate identity and reaffirm group boundaries    **Collective parenting**  Cudworth (2015)- looking after each others kids  Hurcombe et al, 2012- Community looking after children=safety  Piazza 2014- Look after each others  Levinson & Sparkes, 2004- collective monitoring – feeling of safety  Cudworth (2015)- rather be outside  Levinson & Sparkes, 2004- preference for outside  Smith & Ruston, 2013- importance of young and old mixing  Smith & Ruston, 2013-Able to supervise all the children on the site.  Smith & Ruston, 2013 keeping children safe on the site  Greenfields & Smith, 2010 Traveller parents collective supervision and sort things out  unlike non gypsies  Levinson 2005- children always in the company of older women  Levinson 2005- intergenerational time together- preferred to peers- play & leisure & work    **Programme**  Fitzpatrick et al (1997)- Favourable engagement of mother with community programme  Piazza, 2014. Playbus brings resources  Gray & Donnelly, 2013- Playgroup supportive for family with child with ASD  Boyle, Hanafin & Flynn, 2018 Segregated preschool supporting belonging & inclusion- use of resources supporting identity-toys, books | **Attendance in school**  Cudworth, 2015- reduced attendance impacts on belonging in school.  Forkan,2006- Absenteeism from school- complex factors- cultural & educational  Hurcombe et al 2012: Reduced attendance in school  Cavaliero, 2011- Lack of attendance  Gray & Donnelly, 2013- Tended not to access playgroup  Myers, McGhee & Bhopal, 2010 Boys tending to leave school to work  Brown, 2012- School moves impacting on friendship development    **Community Access**  Forkan 2006- Few extra-curricular activities or engagement  Joyce 2015- None  Vanderbeck , 2009- limited  Levinson & Sparkes, 2006- None  Van Hout , 2011- Limited-  Levinson,2005- Children shouting, running around, taking apart playbus.    **Racism & Exclusion- No Friendships or Social Play**  Rose, 2013- Exclusion within town  Cavaliero,2019- Experiences of racism –hierarchy of friendships-  Forkan,2006- No mixing in schoolyard  Devine et al 2008- Racism in school from peers. During Play, Used to negotiate power - Significance of ethnicity to exclusion  Devine et al 2018- Social Relationships and belonging in school- overlapped with home-party invites etc  Joyce,2015-. Racism impacts ability to access space & opportunities  Doyle et al 2020- Memories of segregation in schoolyard  Brown,2017- Excluded in schoolyard & in social interactions.  Cavaliero, 2011- Memories of racism & segregation in playgrounds  Cavaliero, 2011- Racist bullying on playgrounds, others not wanting to play or be friends.  Levinson & Sparkes, 2003- Name calling in schoolyard- younger boys fearful of bullying in school  Levinson & Sparkes, 2006- No friendships outside of Traveller friends.  Van Hout , 2011- Excluded in afterschool & sport clubs  Van Hout , 2011- Racism in school  Gray & Donnelly, 2013- Name calling in school  Murray, 2012 Exclusion in schoolyard  Mason, P; Broughton,K.2007 Discrimination impacting access to play & leisure  Mason, P; Broughton,K.2007- initiatives did not bring children into contact with settled children  Mason, P; Broughton,K.2007 initiatives did not address discriminatory attitudes by mainstream providers.  Boyle,Hanafin & Flynn 2020 Name calling & racist bullying in school, excluded, no friends  Boyle,Hanafin & Flynn 2020 Parents memories of racism  Greenfields & Smith, 2010 Bullying  Myers, McGhee & Bhopal, 2010 Racist bullying in school  Lloyd & McCluskey 2008 NAme calling in playground  Hamilton, Bloomer & Potter,2012- alone in school  Levinson 2005- excluded in schoolyard- bullied & being too rough in soccor  Brown 2012- No friendships in school    **Perceived Needs**  Cemlyn 2000- Practitioners perceive need for Early Years services  Vanderbeck 2009- Youth workers describing children’s need for recreation\leisure    **Racist Perceptions**  Hamilton, Bloomer & Potter,2012 Percieved reluctance of Traveller children to mix- Traveller stating more related to lack of transport  Levinson 2008- Learning through trying & doing- dismantling often misinterpreted as destructive play  Forkan 2006- Absenteeism from school- complex factors- cultural & educational  Devine et al 2008- Benign view of Adults towards racism – Teachers report unable to see in playspaces-out of view.  ? Brunnberg et al, 2015- Vulnerable-special needs to access rights  Doyle et al 2020- Disadvantaged in education  Brown,2017-Teachers complicit in exclusionary practices of ability grouping & ignoring aloneness in schoolyard  Vanderbeck, 2009- majority perspectives shape discourses on children’s & youth’s needs- dismissed children’s interests & preferences and directed to more ‘suitable’ options  Cavaliero, 2011- messing as inappropriate in classroom.  Gray & Donnelly, 2013- Services describing lifestyle as impacting on disability  Murray, 2012 Preschool Teacher telling child not to reveal identity  Murray, 2012 Preschool viewing child as bold and boisterous  Levinson & Martin 2007 Teachers perceived children colonizing playground  Lloyd & McCluskey 2008 Teachers won’t do anything about racism  Boyle, Hanafin & Flynn, 2018- parents describing community expecting poor behaviour from Traveller children  Levinson 2005- Teachers- children did not know how to play  children acting more grown up- wild, uncontrollable, cannot be trusted on the yard when allowed freedom    **Community Norms- Protecting children**  Levinson 2008- Learn more at home than in preschool  Hurcombe et al 2012- Settling leading to reduced mixing within community & lack of community parenting restricting outdoor use  Hurcombe et al 2012- Family protectionist attitudes limit community engagement & result in youth resisting -leading to drug use.  Piazza 2014- Fear of others- parents prevent mixing.  Vanderbeck 2009- Parents describing fear of mixing, wanting separate service provision, playgroup with mixed ages so siblings can look after each other.  Cavaliero, 2011- Parents keeping younger children at home.  Levinson & Sparkes, 2004. Feuding within families impacting on children’s use of space & social interactions  Levinson & Sparkes, 2004- identity & space- change in lifestyle leading to fragmentation in community.  Levinson & Sparkes., 2003- weakness not acknowledged when speaking of fighting  Van Hout , 2011 Traditional values being replaces with need to fit in, generate cultural capital -drug use.  Gray & Donnelly, 2013- Missing Community as settled to access services & create routine for child with ASD.  Mason & Broughton, 2007 Differences within community related to importance of play & leisure  Greenfields & Smith, 2010 Parents preferring mixing with Travellers only  Myers, McGhee & Bhopal, 2010 Parents preventing mixing  Lloyd & McCluskey 2008 Parents not wanting older children to mix in social settings-discos- loss of identity  Levinson 2005- parent encouraging children to fight bullies  Levinson 2005- Children encouraged to learn to deal with the gadje  Levinson 2005- Parents encouraging boys to stick to themselves in school  Levinson 2005. Sharing of adult tasks at home impacted play opportunities  Levinson 2005- Time spent with adults the norm and impacted on social interaction norms- patterns of interaction disconcerting to outsiders  **Government Policies**  Impacting space to play: Cemlyn,2000., Devine & McGillicuddy, 2019  Joyce 2015. Policies & policing restrict community mobility  Doyle et al 2020- State limiting rights of parents as primary educators.  Brown, 2017- Educational policies-ability groupings restrict inclusion  Vanderbeck 2009- Playschool policies refused mixing of ages  Mason, P; Broughton,K.2007- policies not supporting play provision  Lloyd & McCluskey 2008 Parents advising fight back as teachers won’t do anything about racism  Hamilton, Bloomer & Potter,2012 Segregated educaitonal policies furthering social exclusion        **Gender**  Joyce 2015- Boys more impacted from community exclusion, less home activities available.  Lee et al 2016- Girls reduced access to sport  Brunnberg et al, 2015. Girls reduced likelihood of accessing external activities  Levinson & Sparkes, 2004- Girls describing less to do in houses,  Levisnon & Sparkes, 2003- Boys fighting  performing masculine identity  Lee et al 2019- Gender influences on  play  Levinson & Sparkes, 2006- parents protecting girls from community spaces.  Levinson & Sparkes, 2003- loyalty to each other & little regard for outsider perceived lack of loyalty  Levinson & Sparkes, 2006-Girls responsible for domestic chores, boys sitting watching t.v.    Levinson 2005- girls responsible for caring for younger siblings & domestic tasks  Smith & Ruston, 2013 Teenagers losing their way and getting into drugs when in housing  Levinson 2005- girls don’t want to play with gadje girls- too babyish |
| Environmental | **Collective monitoring within site**  Hurcombe et al 2012  Piazza 2014- Safety within site  Levinson & Sparkes, 2004- unrestricted movement of younger children within boundaries of site,    **Importance of Outdoor**  Lee et al 2016- Outdoor physical activities  Levinson & Sparkes, 2004- freedom in site & preference for outside  Levinson & Sparkes, 2003- outdoor play preferences  Myers, McGhee & Bhopal, 2010- children playing together outside in the village  Levinson 2005- Playing with real things- horses, cars, jewellery- available on site.    **Creating space.**  Devine & McGillicuddy-(2019) gym space for children.    **Using community space.**  Levinson 2008-  Fitzpatrick et al (1997)- Favourable engagement of mother with community programme  O Sullivan et al 2018- Programme offered space  Piazza, 2014. Playbus brings resources  Vanderbeck 2009- segregated playgroup offered safe, flexible service.  Murray, 2012 Preschool including child’s interest -supported play enabling child to show strengths-  Rose 2013- Programme supported parent with ideas for play at home  Mason & Broughton,2007- parents found off site programmes was helpful in looking after children  Hanafin et al, 2018 -Segregated preschools formed protective enclaves- welcoming, respectful of culture, distributed leadership--all supported inclusion | **Unsafe Home space**  Pickett et al, 2021( Check re: garden & park)  Devine & McGillicuddy, 2019 Unsafe places to play- government policies- physically dangerous & surveillance-restriction of freedom  Cemlyn,2000- Reduced play spaces ( due to urban accommodation & impact of legislation)  Fitzpatrick et al 1997- Safety & increased accidents on sites  O Sullivan et al, 2018- Lack of play space and play opportunities in sites indoor & outdoor  Lee et al 2016- Impact of halting site on space to play  Joyce, 2015- Nothing available in home environment  Levinson & Sparkes, 2004- Change in site social culture impacting on interactions.  Levinson & Sparkes, 2004- Change to housing from site- less to do Reduced nomadism-, impacting on social relations .Not moving- impacting on cultural participation  Smith & Ruston, 2013- Move to housing limited ability to supervise children’s play together  Levinson 2005- Books not evident, toys not valued, broken  Rose, 2013- space & time not always available for parens to support play at home  Levinson & Martin 2007 No access to books at home    **Community**  Joyce 2015- Restricted access  Vanderbeck , 2009- Youth did not access youthgroups or afterschool programmes.  Levinson & Sparkes, 2006- No use of community spaces  Levinson & Sparkes, 2003- loyalty to each other & little regard for outsider perceived lack of loyalty  Levinson & Sparkes, 2006- girls not allowed into community leisure spaces -discos.  Van Hout , 2011- Excluded in sport  Mason, P; Broughton,K.2007- Lack of access to play & leisure activities- multiple reasons- location of sites, lack of confidence due to discrimination & fears, lack of knowledge & lack of service provider knowledge. Lacking accessible cheap local services  Hamilton, Bloomer & Potter,2012 Lack of attendance in afterschool activties- transport a factor  Levinson 2005- Playbus environemnt did not support play ? Restricted boundaries& rules similar to school    **Unsafe school space**  Levinson 2008- unsafe in preschool  Devine et al 2008, Devine & McGillicuddy 2019  Brown 2017- no sense of belonging in school- wandering aimlessly, at the periphery, waiting outside classrooms.  Levinson & Sparkes, 2003- Fighting in playground, Bullying  Van Hout , 2011 Excluded in afterschool activities & schoolyard  Boyle,Hanafin & Flynn 2020 School –no belonging, excluded, culture not recognised  Myers, McGhee & Bhopal, 2010 Unsafe in school  Levinson 2005- segregated play in schoolyards- playground ownership directed by children  Levinson 2005- schools separating children with different break times  Brown 2012- isolated in school |
