# Supplementary material for: Irish Traveller Children’s Play: A Scoping Review
Source: Springer Nature journal article supplement (doi:10.1007/s10826-023-02695-w), 2023-10-12
Supplement: MOESM4 [file 26173284]

Scoping Review of Irish Traveller children’s play

A Preferred Reporting Items for Systematic Reviews and Meta Analyses- extension for scoping reviews (PRISMA-ScR) (Tricco et al, 2018) flow chart diagram will provide details of the search strategy and results.

| **Initial Search of databases** | | | | | |
| --- | --- | --- | --- | --- | --- |
| **Date & Library System** | **Search String** | **Search Results** | **Excluded on initial screen** | **Reason for Exclusion** | |
| 12th July 2021  xxxx | ("Traveller")) OR ALL=("Gypsy")) AND ALL=(child*)) AND ALL=(play OR physical activity OR social interaction OR leisure OR games OR toys Or sport OR recreation)  Then  ("Traveller children" AND school) | Web of Science  (n = 56) | Web of Science  (n = 26) | Different meaning of word Traveller (Gypsy butterfly”, “Virtual Traveller”, authors named “Roma” and “tourism”). | |
| 26th July 2021 xxxxxx | ("Traveller child*" OR "Gypsy child*”) AND (play OR physical activity OR social interaction OR leisure OR games OR toys OR sport OR recreation)  TITLE-ABS-KEY(( Gypsy OR Traveller ) AND child* AND (play OR "physical activity" OR "social interaction" OR leisure OR games OR toys OR sport OR recreation ))    TITLE-ABS-KEY(( Gypsy OR Traveller ) AND child* AND (play OR "physical activity" OR "social interaction" OR leisure OR games OR toys OR sport OR recreation )) | Scopus (n= 254)  170  84 | Scopus   (n=215) | No reference to child OR play OR Traveller  Related to Roma  Different meaning of Traveller Gypsy butterfly”, “Virtual Traveller”, authors named “Roma” and “tourism”). | |
| 16th July 2021 xxxx | (("Traveller" OR "Gypsy") AND (child*)) AND ((play OR physical activity OR social interaction OR leisure OR games OR toys Or sport OR recreation)) | PubMed (n= 19) | PubMed (n= 15) | Different meaning of Traveller I.e: “Virtual Traveller”, ” and “tourism”). | |
| 25th July 2021  xxxx | “Traveller" OR Gypsy) AND child* AND (school OR play OR "physical activity" OR "social interaction" OR leisure OR games OR toys OR sport OR recreation) | Cinahl (n= 26) | Cinahl  (n= 16) | No reference to Traveller OR child  Different meaning of Traveller  Gypsy butterfly”, “Virtual Traveller”, authors named “Roma” and “tourism”). | |
| 26th July 2021  xxxxx | ("Irish Traveller" OR “ Gypsy”) AND (child*) AND (play OR physical activity OR social interaction OR leisure OR games OR toys OR sport OR recreation) | PsychInfo (n=11) | PsychInfo (n=8) | Roma  Paris Gypsy | |
| 28th July 2021  xxxxx | ('traveller':OR 'gypsy':) AND child* AND ('play'/exp OR play OR 'physical activity'/exp OR 'physical activity' OR (physical AND ('activity'/exp OR activity)) OR 'social interaction'/exp OR 'social interaction' OR (('social'/exp OR social) AND ('interaction'/exp OR interaction)) OR 'leisure'/exp OR leisure OR games OR toys OR 'sport'/exp OR sport OR 'recreation'/exp OR recreation) AND [1989-2021]/ | Embase (n=43) | Embase  (n =39) | Different meaning of Traveller (Gypsy butterfly”, “Virtual Traveller”, authors named “Roma” and “tourism”).  Roma | |
| 12th July 2021 xxxxx  19th July 2021  xxxxx | ("Traveller child*" OR "Gypsy child*) AND (play OR physical activity OR social interaction OR leisure OR games OR toys Or sport OR recreation)  "Irish Traveller" AND child* AND (play OR physical activity OR social interaction OR leisure OR games OR toys Or sport OR recreation) | GoogleScholar  (n=2249)  29  2220 | GoogleScholar  (n=1,901) | No reference to Traveller child AND play OR school  Roma | |
| 26th July 2021 xxxxxx | ("Irish Traveller" OR “ Gypsy”) AND (child*) AND (play OR physical activity OR social interaction OR leisure OR games OR toys OR sport OR recreation) | Soc Index (n=5) | Soc Index (n=4) | Roma | |
| 25th July 2021 xxxxxx | ("Traveller" Or Roma OR Gypsy) AND child* | Cochrane Library   n= (27) | Cochrane Library  (n= 27) | Roma Different meaning for Traveller Gypsy butterfly”, “Virtual Traveller”, authors named “Roma” and “tourism”). | |
| Exported to Mendeley | N = 438 | | | | |
| Duplicates Removed | N= 77 | | | | |
| **Title & Abstract Review . Exported to rayyan** [**https://rayyan.ai/reviews/309260**](https://rayyan.ai/reviews/309260) **Blind Review**  **n = 361** | | | | | |
| Results Excluded | Type of Publication  n = 209 | Different Population  n=39 | No play references  n= 73 | | Unable to access  n = 2 |
|  | Reports n= 82  Books n= 59  Chapters n=42  Thesis n=22  Blog n= 2  Essay n=1  Conference n=1 |  |  | |  |
| **Full text review. Blind Review**  **n= 69** | | | | | |
| Results Excluded | Type of Publication n= 5 | Different Population  n=18 | | No play references  n = 55 | |
| Results from reference search | N= 21 All excluded , no reference to play. | | | | |
| **Included Studies n=35** | | | | | |
