# Supplementary material for: Irish Traveller Children’s Play: A Scoping Review
Source: Springer Nature journal article supplement (doi:10.1007/s10826-023-02695-w), 2023-10-12
Supplement: MOESM5 [file 26173284]

**SCOPING REVIEW PROTOCOL**

| **Overall Project Title** | | To investigate the use of a capabilities approach to develop knowledge and understanding of children’s play and social inclusion in schoolyards - through a critical exploration from multiple perspectives of Traveller children’s play and play support needs in schoolyards. |
| --- | --- | --- |
| **Study 1** | | A scoping review of Irish Traveller children’s play. |
| **Ethical Approval** | | N\A |
| **Researcher** | | xxxxxxxxxxxxxx |
| **Supervisors** | | xxxxxxxxxxxxx |
| **Date** | | 30\06\2021 |
| **Data Management** | | **Folder: xxxxxxxxxx**  **Subfolder Folder**: Scoping Review Data Gathering  **File Name:** Scoping Review Protocol  **Saved:** Microsoft Teams, xxxxxxxxxx |
| **Scoping Review Details** | | |
| **Scoping Review title:** | Irish Traveller children’s (right to) play a scoping review | |
| **Review objective/s:** | To identify, map and summarize the literature on Irish Traveller children’s play. | |
| **Methods** This study will apply the updated methodological guidance for conducting a scoping review from the Joanna Briggs Institute (Peters et al, 2020). As recommended, assistance from the library will be sought (Tricco et al, 2018). The researcher is scheduled to complete a module on systematic literature reviews with the xxxxx library service prior to commencement of this study.  Table 1: Methodological Guidance for Conducting Scoping Reviews (J.B.I, Peters et al, 2020)   | Step | Action | | --- | --- | | 1 | Establish a scoping review protocol | | 2 | Describe Title & Review Questions | | 3 | Establish inclusion & exclusion criteria: Participants, Context & Concept & Types of Evidence Sources | | 4 | Describe search Strategy | | 5 | Data Extraction & Data charting | | 6 | Data Analysis | | 7 | Presentation of Results | | | |
| **STEP 2: DESCRIBE REVIEW QUESTIONS** | 1. What is the available research on representations of Traveller children’s everyday play **and** the factors influencing play opportunities? | |
| **STEP 3: ESTABLISH INCLUSION & EXCLUSION CRITERIA: PARTICPANTS, CONTEXT & CONCEPT & TYPES OF EVIDENCE SOURCES.**  Consultation with experts on the topic, Traveller Rights organisations and an initial search of relevant databases was completed and an analysis of text words in title and abstract and index terms were used to inform the development of inclusion and exclusion criteria with library and supervisors. Inclusion criteria will include languages, publication date limitations and state clearly the rationale for same. | | |
| Population | Irish Traveller children & youth inclusive of gender, ability, and religion, acknowledging the diversity and heterogeneity of Irish Travellers  Age: 0-18 years  Studies with or about Irish Traveller children & youth | |
| Concept | Article 31 of the Convention on the Rights of the Child (CRC) recognizes the right of every child to rest, leisure, play, recreational activities and free and full participation in cultural and artistic life  Play is defined in Article 31 as “any behaviour, activity or process initiated, controlled and structured by children themselves. Play is non-compulsory, driven by intrinsic motivation and undertaken for its own sake, rather than as a means to an end. It may take infinite forms but the key characteristics of play are fun, uncertainty, challenge, flexibility and non-productivity. While play is often considered non-essential, the Committee reaffirms that it is a fundamental and vital dimension of the pleasure of childhood and is an essential component of children’s development”  This review however will include   - **All references to play (play OR physical activity OR social interaction OR leisure OR games OR toys OR sport OR recreation**   This decision is based on the existing literature’s critiques of assumptions of universality within existing definitions | |
| Context | All environments | |
| Types of evidence source | Peer reviewed studies published in English only *will* be included as Irish Travellers reside primarily in English speaking countries.  Studies published since *1989*. The United Nations General Assembly adopted the Convention on the Rights of the Child in November 1989 which included Article 31 Right to play. | |
| Exclusion Criteria | Studies will be excluded if  1) Studies applied ambiguous terms regarding ethnicity e.g., Gypsy, unless a clear statement of inclusion of data relevant to Irish Traveller children was present. Correspondence with authors will be completed to confirm same.  2) The sole focus of the study was literature analysis or theoretical discussion. | |
| **STEP 4: DESCRIBE SEARCH STRATEGY** A three-step method for the Search Strategy design is recommended (Peters et al, 2020) to identify published and unpublished evidence. This scoping review will involve the first two steps.   - Initial search of relevant databases: analysis of text words in title and abstract and index terms used. - Second search using all identified keywords and index terms across databases and search of reference lists for additional studies - Search of grey literature and web resources.   A Preferred Reporting Items for Systematic Reviews and Meta Analyses- extension for scoping reviews (PRISMA-ScR) (Tricco et al, 2018) flow chart diagram will provide details of the search strategy and results.  This search strategy will aim to locate published and unpublished research studies and was also informed by consultation with library staff from xxxxx.   - The first search will be undertaken using search terms based on a concept analysis developed with library staff using inclusion criteria and key terms identified in the initial test search.   ***Table 2: Concept Analysis***   | **Search Terms** | **Synonyms** | **General Terms** | **Specific Terms** | | --- | --- | --- | --- | | Traveller | Gypsy  Pavee  Minceir | Ethnic Minority Minority Ethnic Group | Irish Travellers  Gypsy  Pavee  Minceir | | Children | Youth  Kids | Young people | Girls  Boys | | Play | Leisure  Games  Recreation  Sport | Participation, Engagement Relaxation  Outdoor activity | Outdoor play  Physical Activity  Exercise  Social interaction  Peer play | | Schoolyards | Primary School  National School | Outdoor Spaces | Playgrounds  Schoolyards |   A review of keywords and terms used in relevant material found on initial test search will be used to review the search strategy keywords. Wide search using few limits was identified as necessary to locate relevant findings and searching of full text was required. The search terms used in Web of Science, Google Scholar, Scopus and Pub Med databases were:  ***"Irish Traveller" AND child* AND (play OR physical activity OR social interaction OR leisure OR games OR toys Or sport OR recreation*** -. **Study/Source of Evidence selection**  - Following the search, all identified citations will be collated and uploaded into *Mendeley* Referencing Software and duplicates removed. - All potentially relevant sources will be retrieved in full where possible and imported to rayyan software system for title and abstract review against the broad inclusion criteria by two researchers from the team independently using the blind function. Due to the nature of the literature, the lead researcher will perform a full text review of any potentially relevant sources also. Consultation will follow to discuss unresolved studies. Reasons for exclusion will be recorded and included studies will be uploaded to a separate rayyan review for full text review. - A separate full text review will be completed by by two researchers from the team independently using the blind function and a third researcher will review at least 10 %. Consultation will follow to discuss unresolved studies. Reasons for exclusion of sources of evidence at full text that do not meet the inclusion criteria will be recorded - If information to meet the criteria is not clearly available in the initial search, the authors will be contacted by e-mail for additional information and a follow up e-mail will be forwarded within two weeks. - The results of the search and the study inclusion process will be reported in full in the final scoping review and presented in a Preferred Reporting Items for Systematic Reviews and Meta-analyses extension for scoping review (PRISMA-ScR) flow diagram*.* - The reference list of all included sources of evidence will be screened for additional studies.  **STEP 5: DATA EXTRACTION & DATA CHARTING**  Data will be extracted from papers included in the scoping review by two or more independent reviewers using a standardised data extraction form/charting table, developed as part of the research protocol which will include: **Table 3. Data Charting based on** [**Appendix 11.1 JBI template source of evidence details, characteristics and results extraction instrument**](https://wiki.jbi.global/display/MANUAL/Appendix+11.1+JBI+template+source+of+evidence+details%2C+characteristics+and+results+extraction+instrument)  | **Information regarding the Data source** | **PCC** | **Research** | | --- | --- | --- | | Citation details (e.g. author/s, date, title, journal, volume, issue, pages) | Participants (Age) | Methods & methodology | | Context:  Country, School/community/home/early years | | Key Findings | | Concepts:  Play references |  | | Factors Influencing Play  Individual  Physical Environment  Role of Others  Societal |   The charting table will be piloted and reviewed as the study develops providing increased awareness of the data available. Charting of the data will be performed by at least two researchers. **STEP 6 & 7 DATA ANALYSIS & PRESENTATION**  Data analysis will primarily involve descriptive analysis. A synthesis of results is not appropriate for a scoping review study (Peters et al, 2020).   - Data will be presented graphically to map the evidence available on Irish Traveller & children’s play, and the key representations. - As this scoping review also aims to identify the factors influencing play.   Finney & Atkinson’s (2020) model was used to create a coding framework as an extension to the data extraction form , factors associated with the individual, the physical environment, the role of other people and society were identified.  The results will be summarised in relation to the scoping review objectives as outlined in the scoping review protocol and include the PRISMA SCR reporting framework (Tricco et al, 2018) | | |
